# Supplementary material for: Impact of polyethylene glycol molecular weight on C-phycocyanin stability
Source: Research Square preprint supplement (doi:10.21203/rs.3.rs-7724448/v1), 2025-10-15
Supplement: Supplementary file 1 [file 3dbb44b34c598d03b281707a.docx]

**Supplementary Material**

**Impact of polyethylene glycol molecular weight on C-phycocyanin structural stability**

Mélissa Justina, Adrien Lerbreta, Camille Loupiaca

*aL’Institut Agro, Univ. Bourgogne Europe, INRAE, UMR PAM 1517, F-21000 Dijon, France*

*Corresponding author: [camille.loupiac@agrosupdijon.fr](mailto:camille.loupiac@agrosupdijon.fr)





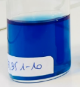

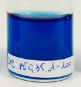

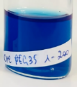

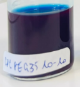

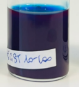

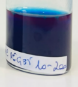

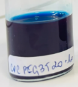

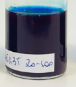

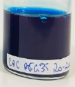

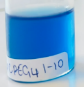

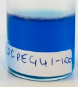

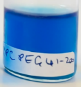

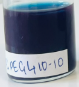

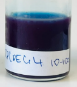

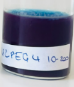

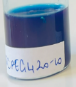

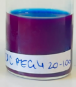

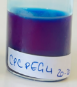


*
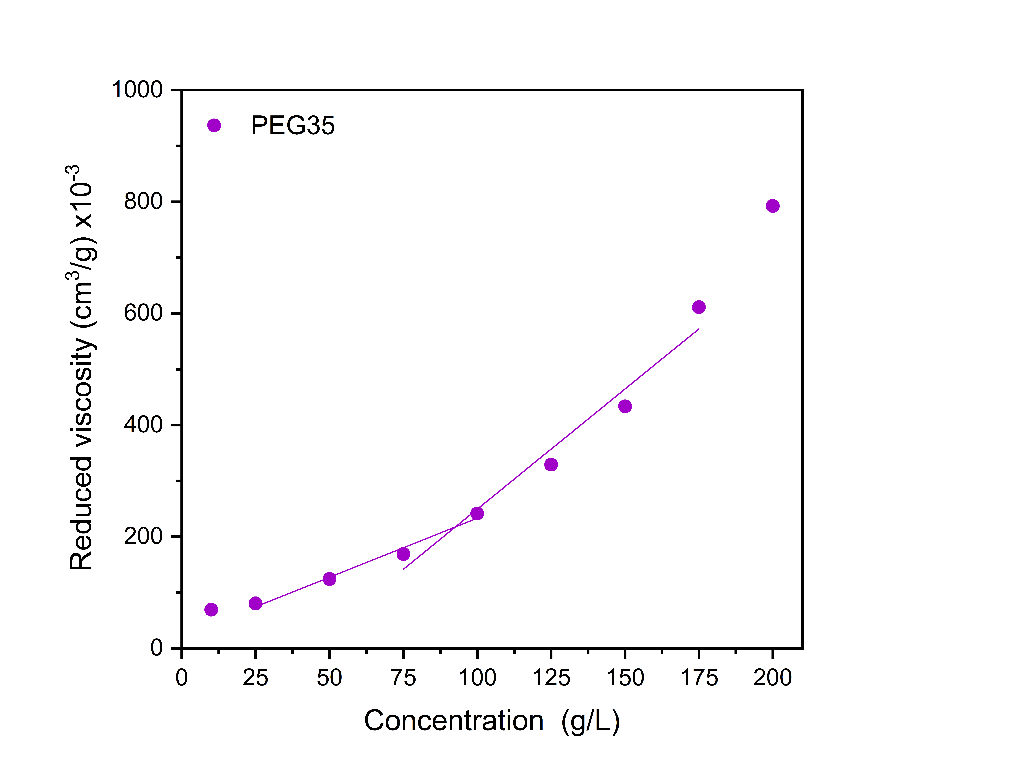
***Fig. S1.** Phase diagram of CPC-PEG mixtures at increasing concentrations


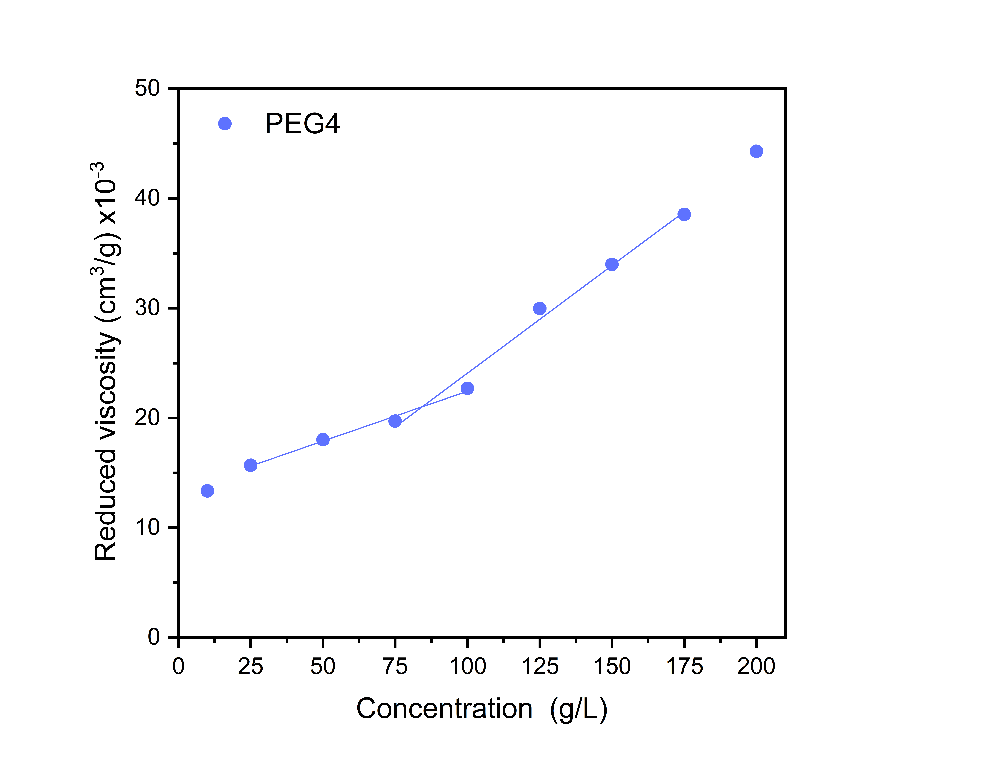


C* = 92 g/L

C* = 83 g/L

**FigS2**. Viscosity profile of PEG4 and PEG35 solutions across the dilute and semi-dilute transition (n=3)

**

**

**FigS3**. Thermogram deconvolution


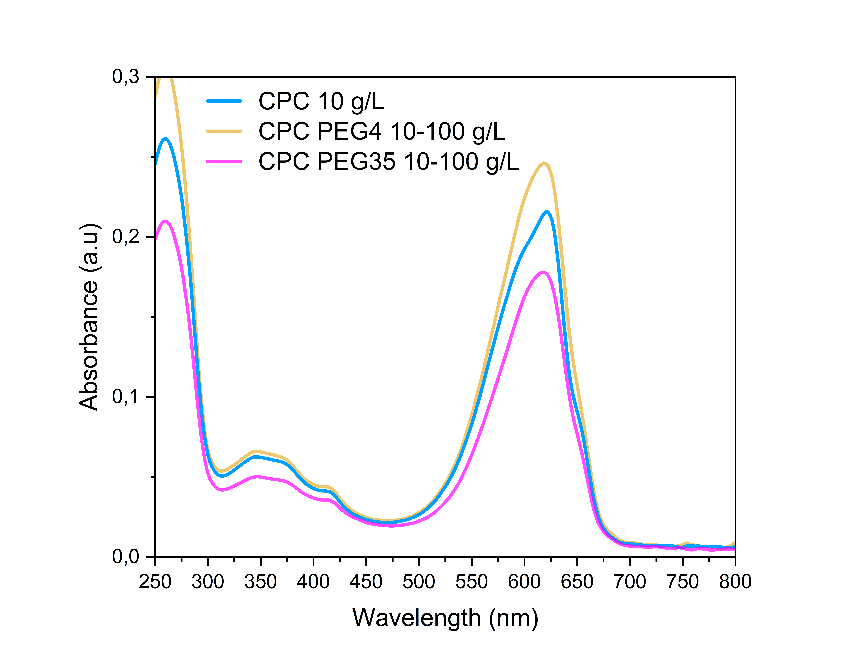




**B**

**A**

**FigS4**. UV-Visible spectra of C-phycocyanin (0.45 µM), CPC PEG4 and CPC PEG35 (A) filtered and (B) unfiltered in 0.1 NaPi buffer at pH 7.2 buffer


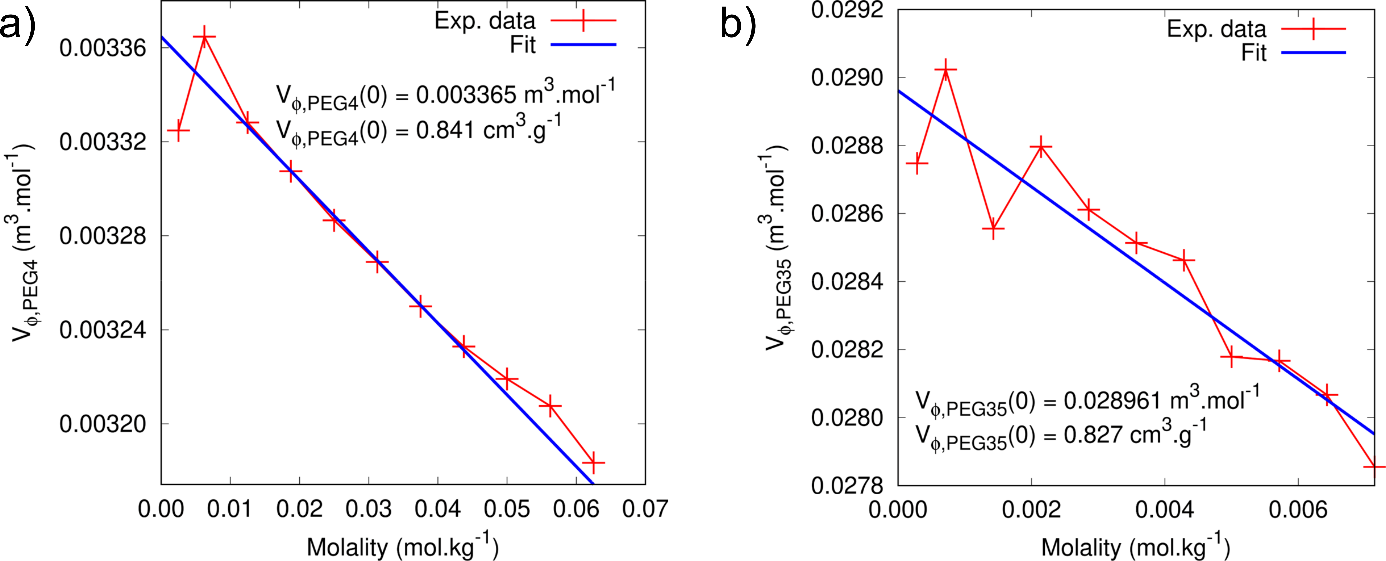


**Fig. S5.** Apparent specific volume of PEG4 (a) and PEG35 (b) as a function of their molality. The specific volumes at infinite dilution determined by linear regression were found to be of 0.841 and 0.827 cm3.g-1 for PEG4 and PEG35, respectively.
